# Supplementary material for: A rapid and sensitive CRISPR/Cas12a based lateral flow biosensor for the detection of Epstein–Barr virus
Source: Royal Society of Chemistry journal article supplement (doi:10.1039/d0an00663g), 2020-01-01
Supplement: d0an00663g1.pdf [file d0an00663g1.pdf]

1 **A rapid and sensitive CRISPR/Cas12a based Lateral flow biosensor for the detection of**  
2 **Epstein-Barr virus**

3 **Ting Yuan<sup>b,#</sup>, Omar Mukama<sup>c,g,h,#</sup>, Zhiyuan Li<sup>c</sup>, Wei Chen<sup>d</sup>, Yuxia Zhang<sup>d</sup>, Jean de Dieu**  
4 **Habimana<sup>c,h</sup>, Yinghui Zhang<sup>a</sup>, Rong Zeng<sup>a</sup>, Chengrong Nie<sup>a</sup>, Zhixu He<sup>e,f,\*</sup>, Lingwen**  
5 **Zeng<sup>a,\*</sup>**

6 <sup>a</sup> School of Food Science and Engineering, Foshan University, Foshan 528231, China

7 <sup>b</sup> Guizhou Provincial Key Laboratory for Regenerative Medicine, Department of Immunology,  
8 Guizhou Medical University, Guiyang, China

9 <sup>c</sup> Key Laboratory of Regenerative Biology, South China Institute for Stem Cell Biology and  
10 Regenerative Medicine, Guangzhou Institutes of Biomedicine and Health, Chinese Academy  
11 of Sciences, Guangzhou 510530, China

12 <sup>d</sup> Department of Blood Transfusion, The Third Affiliated Hospital of Zunyi Medical University  
13 (The First People's Hospital of Zunyi), Zunyi, Guizhou Province, China

14 <sup>e</sup> Key Laboratory of adult stem cell transformation, Chinese Academy of Medical Sciences,  
15 Guizhou Medical University, China

16 <sup>f</sup> Department of Pediatrics, Affiliated Hospital of Zunyi Medical University, Guizhou, China

17 <sup>g</sup> Department of Biology, College of Science and Technology, University of Rwanda, Avenue  
18 de l'armée, P.O. Box: 3900 Kigali-Rwanda □

19 <sup>h</sup> University of Chinese Academy of Sciences, 19 Yuquan Road, Shijingshan District, Beijing,  
20 100049, China

21

22 <sup>#</sup> These two authors contributed equally to this work

23 <sup>\*</sup> Correspondence to: Zhixu He ([hzx@gmc.edu.cn](mailto:hzx@gmc.edu.cn)), Lingwen Zeng ([zeng6@yahoo.com](mailto:zeng6@yahoo.com))

24

25

26

27

28

29

30

31

32

33

34

35 **Supplementary data**

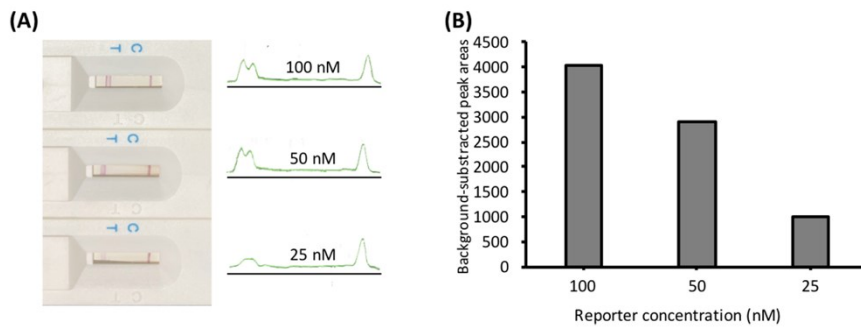

36

37 **Fig. S1** Reporter concentration. (A) LFB images of different reporter concentrations diluted in  
 38 ddH<sub>2</sub>O. (B) Calculated peak area intensities corresponding to LFB test line in (A).

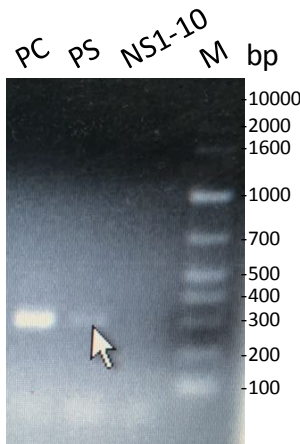

39

40 **Fig. S2** Amplification of 2  $\mu$ l EBV recombinant plasmid (40 ng/ $\mu$ l) and clinical serum samples.  
 41 Lanes 1-3 to positive control (PC), EBV positive sample (PS, arrow), 10 negative samples  
 42 (NS1-10), respectively and lane M is 1-kb marker, respectively.

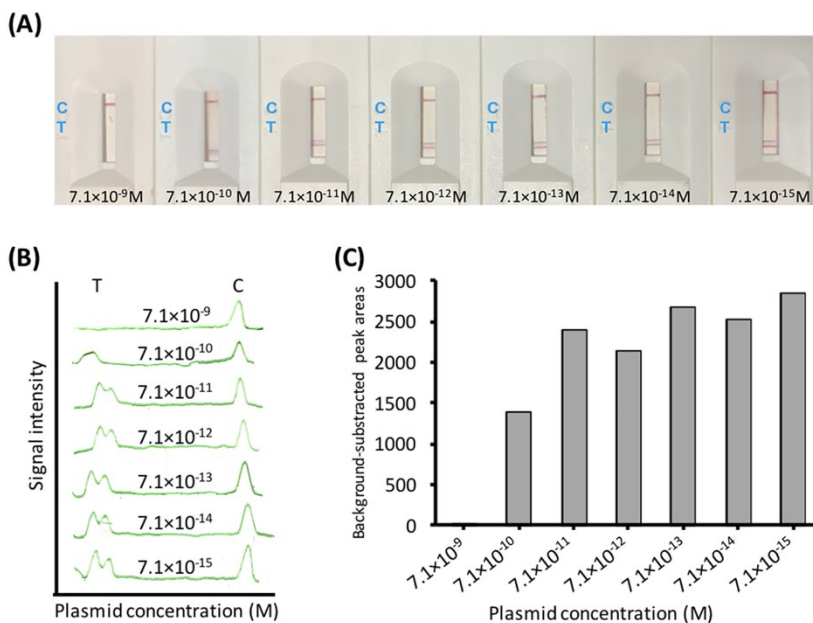

43

44 **Fig. S3** Sensitivity assay for the CRISPR based LFB without PCR pre-amplification. (A) LFB  
45 images of different concentrations of recombinant plasmid subjected to CRISPR/Cas12a. (B)  
46 Peak intensities corresponding to LFB test line (T) and control line (C) in figure (A). (C)  
47 Calculated peak area intensities corresponding to LFB test line in figure (A).  
48  
49  
50  
51  
52
